# Supplementary material for: Molecular and Paleontological Evidence for a Post-Cretaceous Origin of Rodents
Source: PubMed Central journal article supplement (PMC3465340; doi:10.1371/journal.pone.0046445), 2012-10-05
Supplement: pone.0046445.s006.pdf [file pone.0046445.s006.pdf]

**Table S1.** Results of the test of molecular rate heterogeneity. The ucl.d.stdev parameters for each locus and the concatenated, partitioned data-set estimated by BEAST. Abbreviations: 95% C. I. = 95% Confidence Interval; ESS = Effective Sample Size.

| Locus        | ucl.d.stdev | 95% C. I. | ESS |
|--------------|-------------|-----------|-----|
| A2AB         | 0.772       | 0.53-1.02 | 353 |
| CNR1         | 1.788       | 1.35-2.19 | 100 |
| GHR          | 0.649       | 0.47-0.83 | 85  |
| IRBP         | 0.481       | 0.34-0.64 | 485 |
| BRCA1        | 0.781       | 0.59-0.98 | 190 |
| vWF          | 0.628       | 0.46-0.8  | 362 |
| ATP7A        | 0.63        | 0.45-0.82 | 201 |
| Crem 3'UTR   | 0.807       | 0.56-1.09 | 208 |
| RAG2         | 0.704       | 0.51-0.93 | 315 |
| Concatenated | 0.57        | 0.45-0.71 | 383 |
