# Supplementary material for: Molecular and Paleontological Evidence for a Post-Cretaceous Origin of Rodents
Source: PubMed Central journal article supplement (PMC3465340; doi:10.1371/journal.pone.0046445), 2012-10-05
Supplement: pone.0046445.s007.pdf [file pone.0046445.s007.pdf]

**Table S2.** List of taxon sampling for this study. Abbreviations: MVZ = Museum of Vertebrate Zoology, University of California, Berkeley; MCZ = Museum of Comparative Zoology, Harvard University; AMNH = American Museum of Natural History; NMNH = National Museum of Natural History, Smithsonian Institution.

| Classification    | Genus                | Species                                                                                           | Source                    |
|-------------------|----------------------|---------------------------------------------------------------------------------------------------|---------------------------|
| <b>Eutheria</b>   |                      |                                                                                                   |                           |
| <b>Rodentia</b>   |                      |                                                                                                   |                           |
| Dipodidae         | <i>Jaculus</i>       | <i>jaculus</i>                                                                                    | Egypt; GenBank            |
|                   | <i>Jaculus</i>       | <i>blanfordi</i>                                                                                  | MVZ192036                 |
|                   | <i>Allactaga</i>     | <i>hotsoni</i>                                                                                    | MVZ1992077                |
|                   | <i>Cardiocranius</i> | <i>paradoxus</i>                                                                                  | MVZ175166                 |
|                   | <i>Eremodipus</i>    | <i>lichtensteini</i>                                                                              | Russia                    |
|                   | <i>Allactaga</i>     | <i>major</i>                                                                                      | Russia                    |
|                   | <i>Allactodipus</i>  | <i>bobrinskii</i>                                                                                 | Russia                    |
|                   | <i>Alactagulus</i>   | <i>pumilio</i>                                                                                    | Xinjiang, China           |
|                   | <i>Dipus</i>         | <i>sagitta</i>                                                                                    | Nei Mongol, China         |
|                   | <i>Allactaga</i>     | <i>sibirica</i>                                                                                   | Nei Mongol, China         |
|                   | <i>Allactaga</i>     | <i>bullata</i>                                                                                    | Xinjiang, China           |
|                   | <i>Stylodipus</i>    | <i>telum</i>                                                                                      | Xinjiang, China           |
|                   | <i>Euchoreutes</i>   | <i>naso</i>                                                                                       | Xinjiang, China           |
|                   | <i>Allactaga</i>     | <i>elater</i>                                                                                     | Xinjiang, China           |
|                   | <i>Salpingotus</i>   | <i>kozlovi</i>                                                                                    | Xinjiang, China           |
| Zapodidae         | <i>Zapus</i>         | <i>hudsonius</i>                                                                                  | MCZ, Harvard              |
|                   | <i>Napaeozapus</i>   | <i>insignis</i>                                                                                   | MCZ, Harvard              |
| Sicistidae        | <i>Sicista</i>       | <i>S. tianshanica</i> , Xinjiang, China; <i>S. kazbegica</i> , GenBank                            |                           |
| Muridae           | <i>Mus</i>           | <i>musculus</i>                                                                                   | GenBank                   |
|                   | <i>Rattus</i>        | <i>norvegicus</i>                                                                                 | GenBank                   |
| Cricetidae        | <i>Peromyscus</i>    | <i>polionotus</i>                                                                                 | MCZ64944                  |
|                   | <i>Peromyscus</i>    | <i>leucopus</i>                                                                                   | MCZ63171                  |
| Heteromyidae      | <i>Dipodomys</i>     | <i>D. ordii</i> , MCZ; <i>D. spectabilis</i> , <i>D. merriami</i> , <i>D. heermanni</i> , GenBank |                           |
| Castoridae        | <i>Castor</i>        | <i>Canadensis</i>                                                                                 | GenBank                   |
| Sciuridae         | <i>Tamias</i>        | <i>Striatus</i>                                                                                   | MCZ64175; GenBank         |
|                   | <i>Glaucomys</i>     | <i>Volans</i>                                                                                     | MCZ66196; GenBank         |
| Octodontidae      | <i>Octodontomys</i>  | <i>gliroides</i>                                                                                  | AMCC103810, AMNH; GenBank |
| Hystricidae       | <i>Atherurus</i>     | <i>macrourus</i>                                                                                  | AMCC125125, AMNH; GenBank |
| Erethizontidae    | <i>Erethizon</i>     | <i>dorsatum</i>                                                                                   | GenBank                   |
| Geomyidae         | <i>Thomomys</i>      | <i>T. bottae</i> , MVZ174912; <i>T. talpoides</i> , GenBank                                       |                           |
| Caviidae          | <i>Cavia</i>         | <i>C. aperea</i> , MVZ183276; <i>C. porcellus</i> , <i>C. tschudii</i> , GenBank                  |                           |
| Ctenodactylidae   | <i>Ctenodactylus</i> | <i>C. gundi</i> , MVZ201014; <i>C. vali</i> , GenBank                                             |                           |
| Aplodontidae      | <i>Aplodontia</i>    | <i>rufa</i>                                                                                       | MVZ198835; GenBank        |
| <b>Lagomorpha</b> |                      |                                                                                                   |                           |
| Ochotonidae       | <i>Ochotona</i>      | <i>O. princeps</i> , USNM568433, NMNH; <i>O. hyperborea</i> , GenBank                             |                           |
| Leporidae         | <i>Sylvilagus</i>    | <i>floridanus</i>                                                                                 | USNM567962, NMNH; GenBank |
| <b>Primates</b>   |                      |                                                                                                   |                           |

|                       |                    |                   |                           |
|-----------------------|--------------------|-------------------|---------------------------|
| Lemuridae             | <i>Lemur</i>       | <i>catta</i>      | AMCC100346, AMNH; GenBank |
| Hominidae             | <i>Homo</i>        | <i>sapiens</i>    | GenBank                   |
| <b>Carnivora</b>      |                    |                   |                           |
| Canidae               | <i>Canis</i>       | <i>familiaris</i> | GenBank                   |
| Felidae               | <i>Felis</i>       | <i>catus</i>      | GenBank                   |
| <b>Perissodactyla</b> |                    |                   |                           |
| Equidae               | <i>Equus</i>       | <i>cabailus</i>   | GenBank                   |
| <b>Marsupialia</b>    |                    |                   |                           |
| Didelphidae           | <i>Monodelphis</i> | <i>domestica</i>  | GenBank                   |
