# Supplementary material for: Molecular and Paleontological Evidence for a Post-Cretaceous Origin of Rodents
Source: PubMed Central journal article supplement (PMC3465340; doi:10.1371/journal.pone.0046445), 2012-10-05
Supplement: pone.0046445.s008.pdf [file pone.0046445.s008.pdf]

**Table S3.** Characteristics of genes included show the AIC weights supporting the best model for each entry.

| Genes                 | Length (bp) | Variable sites | Parsimony informative sites | Best Model |
|-----------------------|-------------|----------------|-----------------------------|------------|
| A2AB                  | 504         | 197            | 136                         | HKY+I+G    |
| CNR1                  | 469         | 258            | 118                         | GTR+I+G    |
| GHR                   | 650         | 470            | 346                         | GTR+I+G    |
| IRBP                  | 541         | 330            | 252                         | SYM+I+G    |
| BRCA1                 | 573         | 498            | 413                         | HKY+I+G    |
| vWF                   | 477         | 301            | 219                         | HKY+I+G    |
| ATP7A                 | 596         | 346            | 237                         | HKY+I+G    |
| Crem                  | 437         | 269            | 187                         | SYM+G      |
| RAG2                  | 438         | 272            | 193                         | HKY+G      |
| Concatenated data set | 4685        | 2941           | 2101                        | GTR+I+G    |
