# Supplementary material for: Molecular and Paleontological Evidence for a Post-Cretaceous Origin of Rodents
Source: PubMed Central journal article supplement (PMC3465340; doi:10.1371/journal.pone.0046445), 2012-10-05
Supplement: pone.0046445.s009.pdf [file pone.0046445.s009.pdf]

**Table S4. Primer**

| Locus | Part    | Primer Name | Sequence (5' - 3')            | Source                           |
|-------|---------|-------------|-------------------------------|----------------------------------|
| A2AB  | Exon 1  | A2AB-11F    | CATCACCTTCCTCATCCTCTTCAC      | This study                       |
|       |         | A2AB-15R    | ATCAGGTAGATGCGMAGGTAGAC       |                                  |
| BRCA1 | Exon 11 | BRCA1-601F  | AAGCAAACAGTCTGGCTTAGAAAGG     | This study                       |
|       |         | BRCA1-501F  | TGCCARCTYATTACAGCVTGRGA       |                                  |
|       |         | BRCA1-64R   | CTTGATAAAATCCTCAGGTTGAAGGC    |                                  |
|       |         | BRCA1-620R  | YRKGGYTCARRTKRGGGMRGC         |                                  |
| CNR1  |         | CNR1-11F    | AGTGTGGGGGAGAACTTCATGGACAT    | This study                       |
|       |         | CNR1-5R     | CAGACTGMAGCTTCTTGCAGTTCC      |                                  |
| GHR   | Exon 10 | GHR-50F     | TTCTAYARYGATGACTCYTGGGT       | Adkins et al. 2001 <sup>9</sup>  |
|       |         | GHR-750R    | GTAAGGCTTTCTGTGGTGATRTAA      |                                  |
|       |         | GHR-33F     | TTCTACAATGATGACTCTTGGGTTGAGTT | This study                       |
|       |         | GHR-303F    | CAGCACTACCCTAACAGAGGAAGA      |                                  |
|       |         | GHR-301R    | GGGCATAAAAGTCAATGTTGGCCAG     |                                  |
|       |         | GHR-35R     | TTGAGTATGAGGCCCTGTGGAGA       |                                  |
| IRBP  | Exon 1  | IRBP-11F    | CCACGCTGGTCATCTCCTAYGA        | This study                       |
|       |         | IRBP-15R    | TGGCCTATTCTCAGCTTCTGGAG       |                                  |
| vWF   | Exon 28 | vWF-101F    | TGTCAACCTCACCTGTGAAGCCTG      | Huchon et al. 1999 <sup>10</sup> |
|       |         | vWF-103R    | GACCTTCTTCTTCTTCAAGCCCTGG     | This study                       |
|       |         | vWF-F101g   | TGTS AACCTYACSTGTGAAGCCTG     |                                  |
|       |         | vWF-113R    | RACCTTCTTCTTCTTSARDCCYTGG     |                                  |
| ATP7A |         | ATP7A-11F   | TCCCTGGACAATCAAGAAGC          | Murphy et al. 2001 <sup>11</sup> |
|       |         | ATP7A-15R   | AAGGTAGCATCAAATCCCATGT        |                                  |
| Crem  | 3'-UTR  | Crem-21F    | CTTGTAGAAGGGACCCTTGT          | This study                       |
|       |         | Crem-19R    | ACATTCTTTTGCCACTTCCCT         |                                  |
|       |         | Crem-23F    | GTCTGCCCTCTTGCTTCTA           |                                  |
|       |         | Crem-17R    | TCATGCACTAAGCCAAGCTG          |                                  |
| RAG2  |         | RAG2-21F    | CGAGGGAAAAGTATGGGTGT          | This study                       |
|       |         | RAG2-19R    | GGTATCACTTCTGGCAATGG          |                                  |
|       |         | RAG2-23F    | ACATACTTCCAGA ACTT CAGG       |                                  |
|       |         | RAG2-17R    | TTCTGTGGTTCTTTGGGTAGA         |                                  |
