# Supplementary material for: Molecular and Paleontological Evidence for a Post-Cretaceous Origin of Rodents
Source: PubMed Central journal article supplement (PMC3465340; doi:10.1371/journal.pone.0046445), 2012-10-05
Supplement: pone.0046445.s010.pdf [file pone.0046445.s010.pdf]

**Table S5.** List of the GenBank accession numbers

| Genus                | Species              | Accession Number                                                                                                                                  |
|----------------------|----------------------|---------------------------------------------------------------------------------------------------------------------------------------------------|
| <i>Jaculus</i>       | <i>jaculus</i>       | A2AB: JF938725; CNR1: JF938804; GHR: JF938854; IRBP: JF938880; BRCA1: JF938777; vWF: AJ297765; ATP7A: JF938751; Crem: JF938827; RAG2: JF938903    |
|                      | <i>blanfordi</i>     | A2AB: JF938726; CNR1: JF938805; GHR: JF938855; IRBP: JF938881; BRCA1: JF938778; vWF: JF938703; ATP7A: JF938752; Crem: JF938828; RAG2: Jb JF938904 |
| <i>Allactaga</i>     | <i>hotsoni</i>       | A2AB: JF938728; CNR1: JF938807; GHR: JF938857; IRBP: JF938883; BRCA1: JF938778; vWF: JF938705; ATP7A: JF938754; Crem: JF938830; RAG2: JF938906    |
|                      | <i>elater</i>        | A2AB: JF938727; CNR1: JF938806; GHR: JF938856; IRBP: JF938882; BRCA1: JF938779; vWF: JF938704; ATP7A: JF938753; Crem: JF938829; RAG2: JF938905    |
|                      | <i>sibirica</i>      | A2AB: JF938716; CNR1: JF938795; GHR: JF938845; IRBP: JF938871; BRCA1: JF938768; vWF: JF938694; ATP7A: JF938742; Crem: JF938818; RAG2: JF938894    |
|                      | <i>major</i>         | A2AB: JF938717; CNR1: JF938796; GHR: JF938846; IRBP : JF938872; BRCA1: F938769; vWF: JF938695; ATP7A: JF938743; Crem: JF938819; RAG2: JF938895    |
|                      | <i>bullata</i>       | A2AB: JF938722; CNR1: JF938801; GHR: JF938851; IRBP: JF938877; BRCA1: JF938774; vWF: JF938700; ATP7A: JF938748; Crem: JF938824; RAG2: JF938900    |
| <i>Alactagulus</i>   | <i>pumilio</i>       | A2AB: JF938718; CNR1: JF938797; GHR: JF938847; IRBP: JF938873; BRCA1: JF938770; vWF: JF938696; ATP7A: JF938744; Crem: JF938820; RAG2: JF938896    |
| <i>Allactodipus</i>  | <i>bobrinskii</i>    | A2AB: JF938719; CNR1: JF938798; GHR: JF938848; IRBP: JF938874; BRCA1: JF938771; vWF: JF938697; ATP7A: JF938745; Crem: JF938821; RAG2: JF938897    |
| <i>Euchoreutes</i>   | <i>naso</i>          | A2AB: JF938724; CNR1: JF938803; GHR: JF938853; IRBP: JF938879; BRCA1: JF938776; vWF: JF938702; ATP7A: JF938750; Crem: JF938826; RAG2: JF938902    |
| <i>Eremodipus</i>    | <i>lichtensteini</i> | A2AB: JF938721; CNR1: JF938800; GHR: JF938850; IRBP: JF938876; BRCA1: JF938773; vWF: JF938699; ATP7A: JF938747; Crem: JF938823; RAG2: JF938899    |
| <i>Dipus</i>         | <i>sagitta</i>       | A2AB: JF938720; CNR1: JF938799; GHR: JF938849; IRBP: JF938875; BRCA1: JF938772; vWF: JF938698; ATP7A: JF938746; Crem: JF938822; RAG2: JF938898    |
| <i>Stylodipus</i>    | <i>telum</i>         | A2AB: JF938723; CNR1: JF938802; GHR: JF938852; IRBP: JF938878; BRCA1: JF938775; vWF: JF938701; ATP7A: JF938749; Crem: JF938825; RAG2: JF938901    |
| <i>Cardiocranius</i> | <i>paradoxus</i>     | A2AB: JF938732; CNR1: JF938811; GHR: JF938862; IRBP: JF938887; BRCA1: JF938785; vWF: JF938709; ATP7A: JF938758; Crem: JF938834; RAG2: JF938911    |
| <i>Salpingotus</i>   | <i>kozlovi</i>       | A2AB: JF938729; CNR1: JF938808; GHR: JF938858; IRBP: JF938884; BRCA1: JF938781; vWF: JF938706; ATP7A: JF938755; Crem: JF938831; RAG2: JF938907    |
| <i>Zapus</i>         | <i>hudsonius</i>     | A2AB: JF938714; CNR1: JF938793; GHR: JF938843; IRBP: JF938869; BRCA1: JF938766; vWF: JF938692; ATP7A: JF938740; Crem: JF938816; RAG2: JF938892    |
| <i>Napaeozapus</i>   | <i>insignis</i>      | A2AB: JF938715; CNR1: JF938794; GHR: JF938844; IRBP: JF938870; BRCA1: JF938767; vWF: JF938693; ATP7A: JF938741; Crem: JF938817; RAG2: JF938893    |

|                      |                    |                                                                                                                                                  |
|----------------------|--------------------|--------------------------------------------------------------------------------------------------------------------------------------------------|
| <i>Sicista</i>       | <i>tianshanica</i> | A2AB: JF938713; CNR1: JF938792; GHR: JF938842; IRBP: JF938868; BRCA1: JF938765; ATP7A: JF938739; Crem: JF938815; RAG2: JF938891                  |
|                      | <i>kazbegica</i>   | vWF: AJ297764                                                                                                                                    |
| <i>Mus</i>           | <i>musculus</i>    | A2AB: NM009633; CNR1: AY522554; GHR: NM010284; IRBP: AB125808; BRCA1: NM009764; vWF: AF539800; ATP7A: AY011397; Crem: M60284; RAG2: AY011940     |
| <i>Rattus</i>        | <i>norvegicus</i>  | A2AB: NM138505; CNR1: NM012784; GHR: X16726; IRBP: AJ429134; BRCA1: NM012514; vWF: AJ224673; ATP7A: AY011398; Crem: NM001110860; RAG2: AY011941  |
| <i>Peromyscus</i>    | <i>polionotus</i>  | A2AB: JF938730; CNR1: JF938809; GHR: JF938859; IRBP: JF938885; BRCA1: JF938782; vWF: JF938707; ATP7A: JF938756; Crem: JF938832; RAG2: JF938908   |
| <i>Peromyscus</i>    | <i>leucopus</i>    | A2AB: JF938731; CNR1: JF938810; GHR: JF938860; IRBP: JF938886; BRCA1: JF938783; vWF: JF938708; ATP7A: JF938757; Crem: JF938833; RAG2: JF938909   |
| <i>Dipodomys</i>     | <i>ordii</i>       | GHR: JF938861; BRCA1: JF938784; RAG2: JF938910                                                                                                   |
|                      | <i>merriami</i>    | A2AB: AJ427261; IRBP: AJ427233; vWF: AJ427226                                                                                                    |
|                      | <i>spectabilis</i> | CNR1: AY303183                                                                                                                                   |
|                      | <i>heermanni</i>   | ATP7A: AY011402; Crem: AY011648                                                                                                                  |
| <i>Castor</i>        | <i>canadensis</i>  | A2AB: AJ427260; CNR1: AY011576; GHR: AF332026; IRBP: AF297279; BRCA1: AF540622; vWF: AJ427228; ATP7A: AY011394; Crem: AY011640; RAG2: AY011937   |
| <i>Tamias</i>        | <i>striatus</i>    | A2AB: JF938733; CNR1: AY011575; GHR: JF938863; IRBP: AF297282; BRCA1: JF938786; vWF: JF938710; ATP7A: AY011393; Crem: AY011639; RAG2: AY011936.1 |
| <i>Glaucomys</i>     | <i>volans</i>      | A2AB: JF938734; CNR1: JF938812; GHR: JF938864; IRBP: AY227598; BRCA1: AF284003; vWF: AJ224667; ATP7A: JF938759; Crem: JF938835; RAG2: JF938912   |
| <i>Octodontomys</i>  | <i>gliroides</i>   | A2AB: JF938735; CNR1: JF938813; GHR: AF520649; IRBP: JF938888; BRCA1: JF938787; vWF: JF938711; ATP7A: JF938760; Crem: JF938836; RAG2: JF938913   |
| <i>Atherurus</i>     | <i>macrourus</i>   | A2AB: JF938736; CNR1: JF938814; GHR: JF938865; IRBP: JF938889; BRCA1: JF938788; vWF: AJ251131; ATP7A: JF938761; Crem: JF938837; RAG2: JF938914   |
| <i>Erethizon</i>     | <i>dorsatum</i>    | A2AB: AJ427270; CNR1: AY303186; GHR: AF332037; IRBP: AJ427249; BRCA1: AF540626; vWF: AJ251135; ATP7A: AY011401; Crem: AY011647; RAG2: AY011944   |
| <i>Thomomys</i>      | <i>bottae</i>      | CNR1: AY303196; GHR: AM407911; IRBP: AF297277; BRCA1: JF938790; ATP7A: JF938762; Crem: JF938841; RAG2: AY303215                                  |
|                      | <i>talpoides</i>   | A2AB: AJ427262; vWF: AJ427227                                                                                                                    |
| <i>Cavia</i>         | <i>aperea</i>      | GHR: AF433930; BRCA1: JF938791                                                                                                                   |
|                      | <i>porcellus</i>   | A2AB: AJ271336; IRBP: AJ427248; vWF: AJ224663                                                                                                    |
|                      | <i>tschudii</i>    | CNR1: AY011586; ATP7A: AY011404; Crem: AY011650; RAG2: AY011947                                                                                  |
| <i>Ctenodactylus</i> | <i>gundi</i>       | A2AB: JF938738; CNR1: FM162130; GHR: AF332042; BRCA1: AF540624; ATP7A: JF938764; Crem: JF938840; RAG2: FM162097                                  |
|                      | <i>vali</i>        | IRBP: AM407923; vWF: AJ238387                                                                                                                    |
| <i>Aplodontia</i>    | <i>rufa</i>        | A2AB: AJ427256; CNR1: AY303279; GHR: AF332030; IRBP: AF297284; BRCA1: AF332045; vWF: AJ224662; ATP7A: JF938763; Crem: JF938839; RAG2: AY303198   |

|                    |                   |                                                                                                                                                                            |
|--------------------|-------------------|----------------------------------------------------------------------------------------------------------------------------------------------------------------------------|
| <i>Ochotona</i>    | <i>princeps</i>   | A2AB: AJ427253; CNR1: AY303188; GHR: JF938867; IRBP: AY057832; BRCA1: AF540635; vWF: AJ224672                                                                              |
|                    | <i>hyperborea</i> | ATP7A: AY011409; Crem: AY011655; RAG2: AY011953                                                                                                                            |
| <i>Sylvilagus</i>  | <i>floridanus</i> | A2AB: JF938737; CNR1: AY011591; GHR: AF332017; IRBP: JF938890; BRCA1: JF938789; vWF: JF938712; ATP7A: AY011408; Crem: JF938838; RAG2: AY011952                             |
| <i>Lemur</i>       | <i>catta</i>      | A2AB: AJ891067; CNR1: AY011595; GHR: JF938866; IRBP: AJ313470; BRCA1: DQ354455; vWF: AJ410292; ATP7A: AY011412; Crem: AY011658; RAG2: AY011956                             |
| <i>Homo</i>        | <i>sapiens</i>    | A2AB: NM000682; CNR1: NM001160260; GHR: NM000163; IRBP: M22453; BRCA1: NM007294; vWF: NM000552; ATP7A: NM000052; Crem: AY011664; RAG2: NM000536.2                          |
| <i>Canis</i>       | <i>familiaris</i> | A2AB: AJ891051; CNR1: XM539034; GHR: NM001003123; IRBP: DQ205906; BRCA1: NM001013416; vWF: NM001002932; ATP7A: XM549096; Crem: AY011682; RAG2: XM540537.2                  |
| <i>Felis</i>       | <i>catus</i>      | A2AB: AJ251174; CNR1: AY011615; GHR: EU448991; IRBP: Z11811; BRCA1: AF284018; vWF: AF061062; ATP7A: AY011433; Crem: AY011679; RAG2: AY011977                               |
| <i>Equus</i>       | <i>caballus</i>   | A2AB: Y15945; CNR1: AY011612; GHR: XM001498656; IRBP: U48710; BRCA1: AF284010; vWF: XM001915467; ATP7A: AY011430; Crem: AY011676; RAG2: AF447533                           |
| <i>Monodelphis</i> | <i>domestica</i>  | A2AB: XM001382024; CNR1: XM001362407; GHR: NM001032976; IRBP: XM001371829; BRCA1: AY994160; vWF: AY243415; ATP7A: XM001363299; Crem: ENSMODG00000006900; RAG2: XM001362253 |
