# Supplementary material for: Molecular and Paleontological Evidence for a Post-Cretaceous Origin of Rodents
Source: PubMed Central journal article supplement (PMC3465340; doi:10.1371/journal.pone.0046445), 2012-10-05
Supplement: pone.0046445.s011.pdf [file pone.0046445.s011.pdf]

**Table S6.** Comparisons of divergence times for major nodes estimated using BEAST<sup>12</sup> with full taxa and with a tree that is free of NDE by reducing taxon sampling in the subfamilies Dipodinae and Allactaginae. Values in parentheses are the 95% Bayesian credibility intervals. Note that these two analyses produced similar estimates of divergence times for major nodes. Statistical test shows that there is no significant difference between these two time estimates (t-test, p-value = 0.954).

| Node | Description of node              | Full taxa         | Reduced taxa     |
|------|----------------------------------|-------------------|------------------|
| 1    | Marsupialia-Placentalia          | 165.3 (160-175.7) | 166 (160-177.8)  |
| 2    | Base of Boreoeutheria            | 69.8 (58.6-81.9)  | 70.6 (58.8-83.3) |
| 3    | Perissodactyla-Carnivora         | 56.5 (44.2-69.5)  | 55.4 (43.7-68.1) |
| 4    | Caniformia-Feliformia            | 41.6 (38-48.4)    | 41.5 (38-47.9)   |
| 5    | Primates-Glires                  | 65.2 (55-75.4)    | 66.9 (56-78.3)   |
| 6    | Hominoidea-Lemuroidea            | 55.6 (40.4-70)    | 58.1 (42.9-72.4) |
| 7    | Lagomorpha-Rodentia              | 61.7 (52.8-71)    | 63.2 (53.6-73.8) |
| 8    | Ochotonidae-Leporidae            | 34.6 (18.8-50.7)  | 36.5 (19.7-52.4) |
| 9    | Base of Rodentia                 | 57.7 (50.1-66)    | 58.8 (50.5-68.3) |
| 10   | Base of Hystricomorpha           | 50.2 (41.6-58.7)  | 51.2 (42.2-60.2) |
| 11   | Hystricidae-Caviomorpha          | 36.9 (31.6-43)    | 37.4 (31.8-43.7) |
| 12   | <i>Octodontomys-Erethizon</i>    | 29.8 (28.5-32.2)  | 29.9 (28.5-32.4) |
| 13   | <i>Cavia-Erethizon</i>           | 24.6 (17.6-30)    | 24.9 (18.4-30.2) |
| 14   | Myodonta-Sciuromorpha            | 55.6 (48.4-63.2)  | 56.9 (48.8-65.7) |
| 15   | Base of Sciuromorpha             | 25.4 (11.9-38.6)  | 27.3 (13.4-42.2) |
| 16   | <i>Glaucomys-Tamias</i>          | 17.8 (7.3-29.9)   | 19.5 (7.5-32.5)  |
| 17   | Myodonta-Castorimorpha           | 52.9 (46.5-59.9)  | 54.3 (46.9-62.6) |
| 18   | Base of Castorimorpha            | 45.5 (33.9-55.3)  | 47 (35.5-57.5)   |
| 19   | Heteromyidae-Geomyidae           | 20.6 (9.9-32.2)   | 20.8 (10.1-32.2) |
| 20   | Muroidea-Dipodoidea              | 45.4 (43-49.4)    | 45.7 (43-50.1)   |
| 21   | Cricetidae-Muridae               | 23.4 (14.7-32.2)  | 23.7 (14.9-32.6) |
| 22   | Mouse-Rat                        | 9.5 (7.3-12.9)    | 9.6 (7.3-13)     |
| 24   | Base of Dipodoidea               | 32.4 (25.2-39.7)  | 32.7 (25.1-40)   |
| 25   | Zapodidae-Dipodidae              | 25.3 (19.1-31.7)  | 25.2 (19-32.2)   |
| 26   | <i>Zapus-Napaeozapus</i>         | 5.7 (1.9-10.1)    | 5.8 (2.1-10.2)   |
| 27   | Base of Dipodidae                | 18.3 (13.9-22.8)  | 17.6 (13.6-22)   |
| 28   | <i>Salpingotus-Cardiocranius</i> | 10.2 (9-12.4)     | 10.2 (9-12.2)    |
| 29   | Euchoreutinae-Allactaginae       | 14.1 (11.2-17.3)  | 13 (10.9-15.5)   |
| 30   | Dipodinae-Allactaginae           | 12.4 (10.5-14.9)  | 11.6 (10.5-13.4) |
| 31   | Base of Allactaginae             | 7.7 (5.4-9.9)     | 5.8 (3.1-8.6)    |
| 37   | Base of Dipodinae                | 7.5 (5-9.8)       | 6 (3.4-8.6)      |
